# Supplementary material
Source: Springer Nature journal article supplement (https://www.springermedizin.de/resource/supplementary/12885_2013_4689_MOESM5_ESM.pdf/9467038)

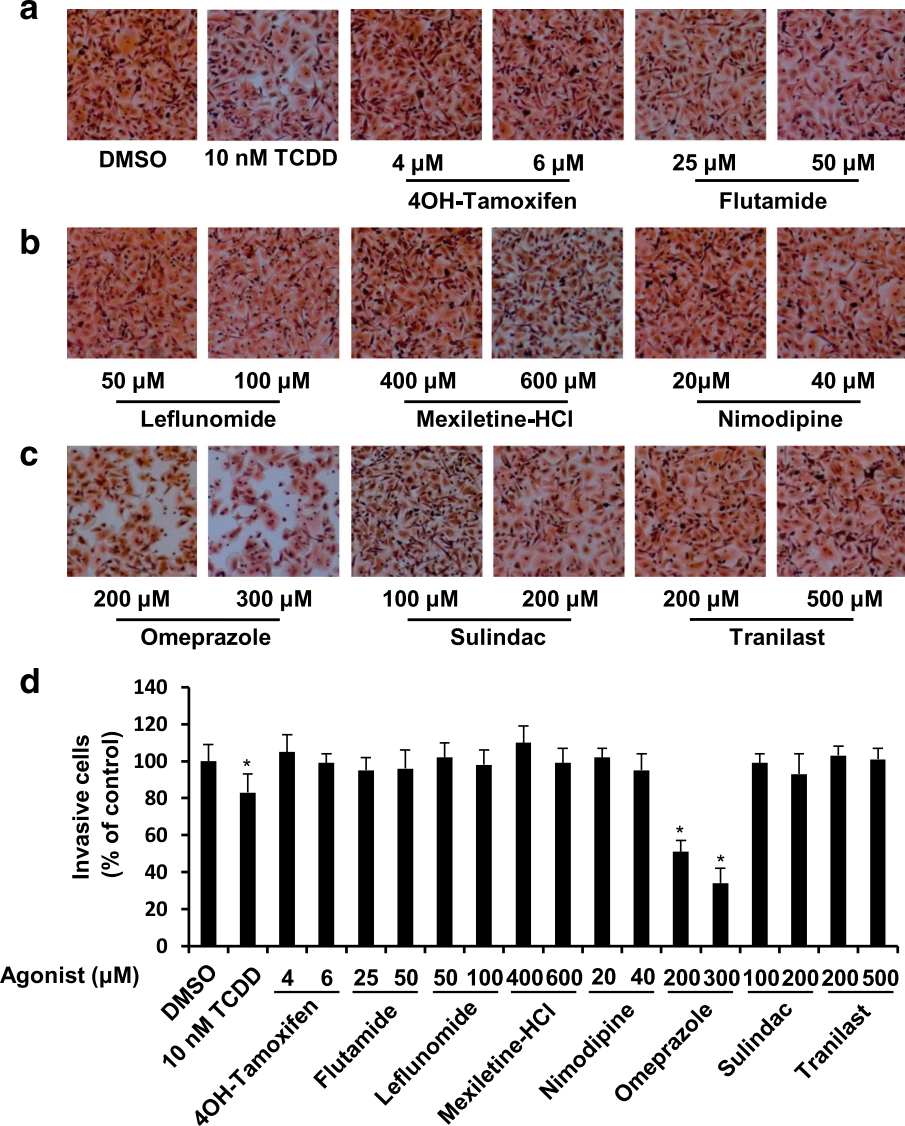

Supplement: MOESM5 [file 9467038]
